# Supplementary material for: Antibody-secreting cell destiny emerges during the initial stages of B-cell activation
Source: PubMed Central journal article supplement (PMC7417592; doi:10.1038/s41467-020-17798-x), 2020-08-10
Supplement: 41467_2020_17798_MOESM3_ESM.pdf [file 41467_2020_17798_MOESM3_ESM.pdf]

## Description of Additional Supplementary Files

**File Name:** Supplementary Data 1

**Description:** Detailed list of all antibody/stains used in flow cytometry, ELISA, and ELISPOT experiments. List includes information about antibody clones, company, catalog numbers, dilutions, and specific notes when necessary for clarity.
